# Supplementary material
Source: Springer Nature journal article supplement (https://www.springermedizin.de/resource/supplementary/12885_2006_613_MOESM2_ESM.pdf/9469896)

BrCa incidence rates per 100,000 py

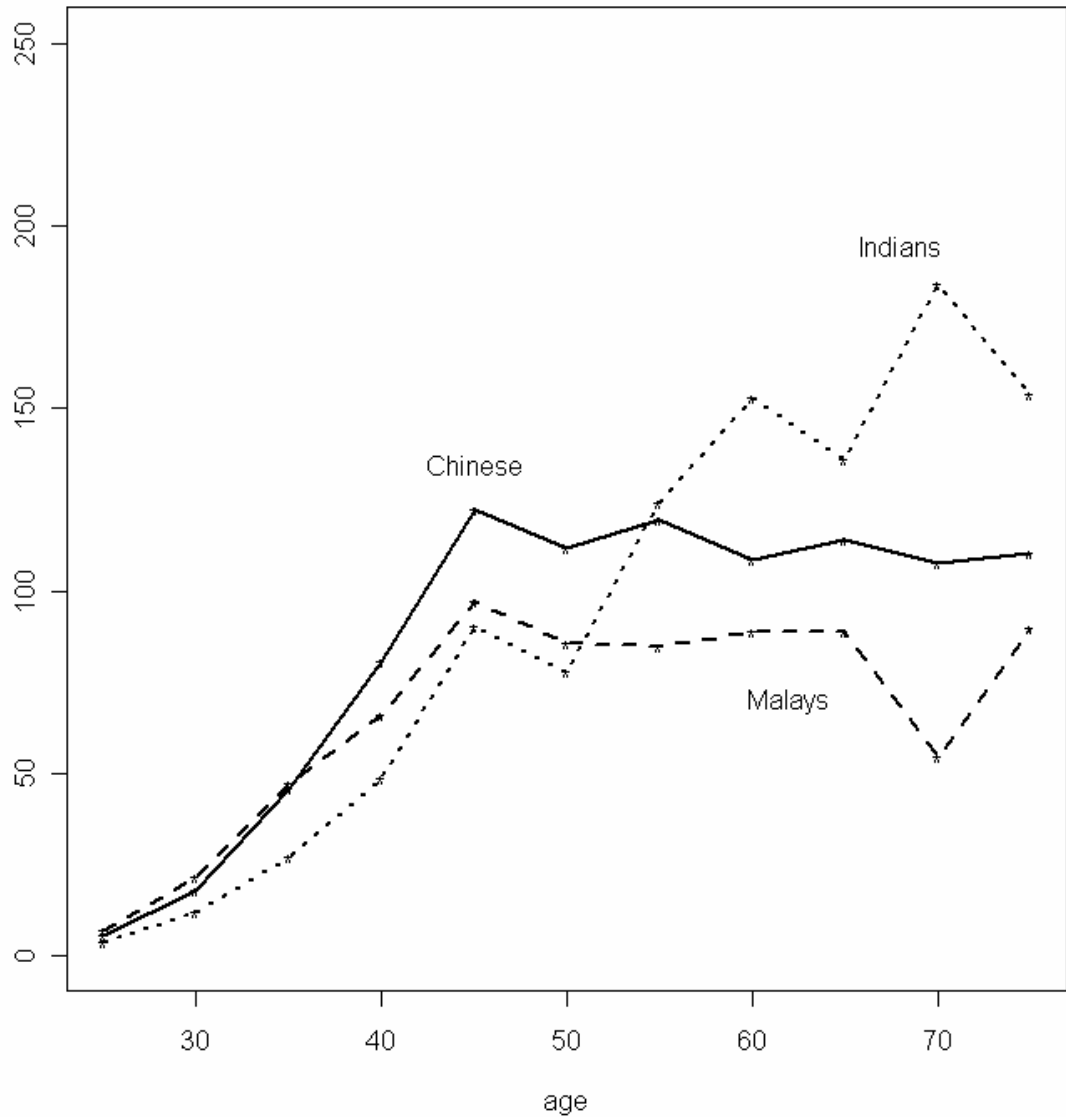

Supplement: MOESM2 [file 9469896]
